# Supplementary material for: Brief communication: An Ice surface melt scheme including the diurnal cycle of solar radiation
Source: Copernicus journal article supplement (doi:10.5194/tc-2018-130), 2018-07-11
Supplement: Supplementary file 1 [file tc-2018-130-supplement.pdf]

# **Brief communication: An Ice surface melt scheme including the diurnal cycle of solar radiation**

Uta Krebs-Kanzow<sup>1</sup>, Paul Gierz<sup>1</sup>, and Gerrit Lohmann<sup>1</sup>

<sup>1</sup>Alfred Wegener Institute Helmholtz Centre for Polar and Marine Research, Bremerhaven, Germany

**Correspondence:** Uta Krebs-Kanzow (uta.krebs-kanzow@awi.de)

<https://doi.org/10.5194/tc-0-1-2018-supplement>

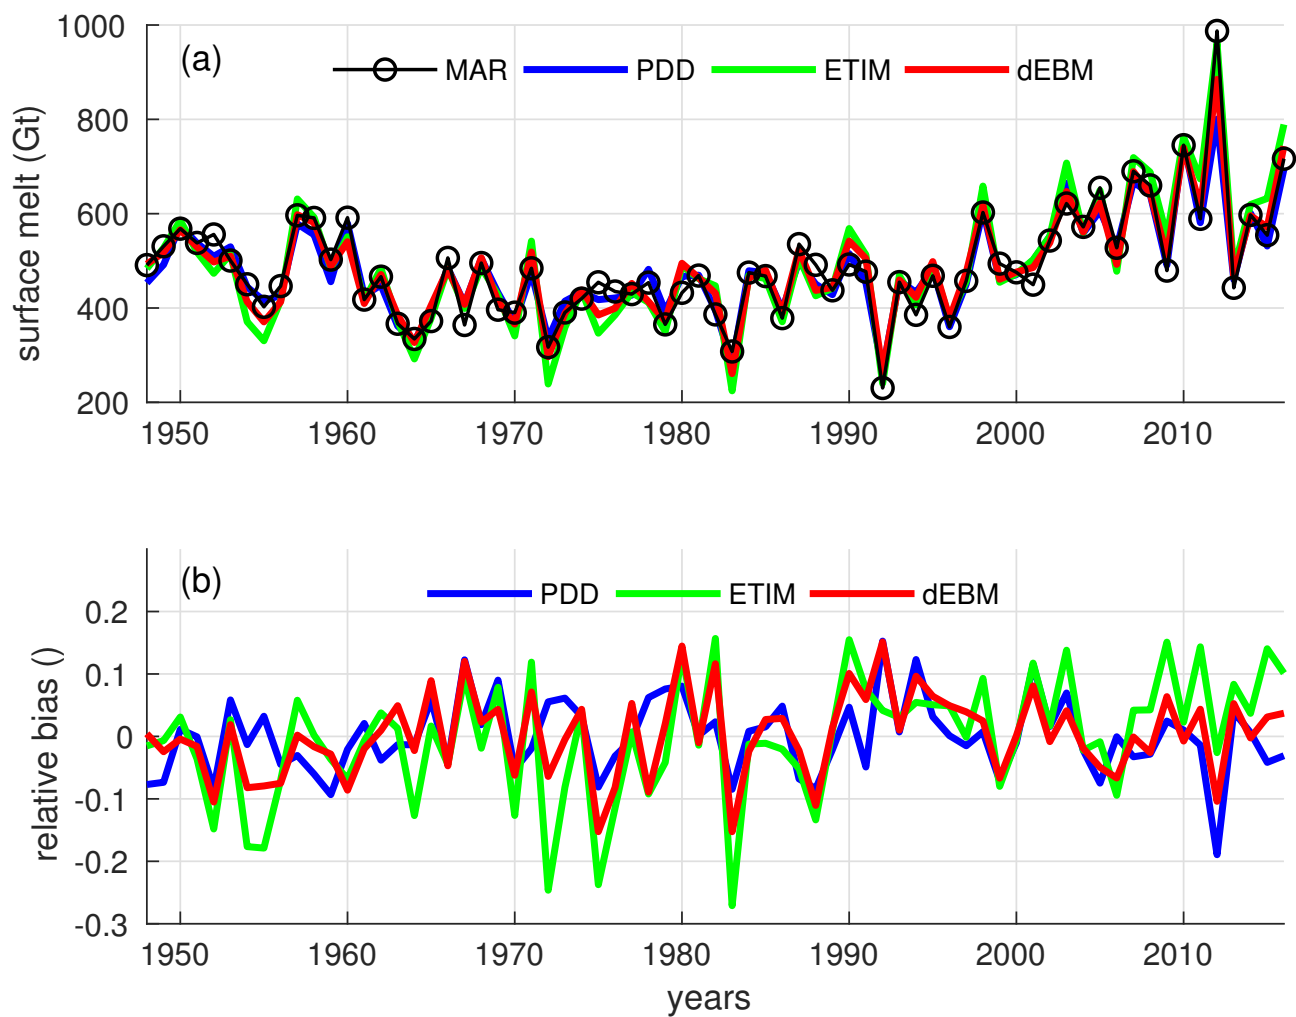

**Figure S1.** Multi-year monthly mean melt rates averaged of the years 1948-2016 as predicted by a) the PDD-scheme, b) the ETIM and c) the dEBM against respective MAR melt rates. Colors reflect the length of the daily melt period. Identity is displayed as a black line in all panels for comparison.
